# Supplementary material for: Discovery of nucleotide polymorphisms in the Musa gene pool by Ecotilling
Source: PubMed Central journal article supplement — Theor Appl Genet. 2010 Jun 30;121(7):1381–9. doi: 10.1007/s00122-010-1395-5 (PMC2955235; doi:10.1007/s00122-010-1395-5), 2010-06-30
Supplement: 122_2010_1395_MOESM1_ESM.pdf [file 122_2010_1395_MOESM1_ESM.pdf]

Supplementary File 1: Musa accessions used in this study.

Journal: Theoretical and Applied Genetics, Title: Discovery of nucleotide polymorphisms in the *Musa* gene pool by Ecotilling. Bradley J. Till<sup>1</sup>, Joanna Jankowicz-Cieslak<sup>1</sup>, László Sági<sup>2</sup>, Owen A. Huynh<sup>1</sup>, Hiroe Utsushi<sup>3</sup>, Rony Swennen<sup>2,4</sup>, Ryohei Terauchi<sup>3</sup>, and Chikelu Mba<sup>1</sup>. <sup>1</sup> Plant Breeding Unit, FAO/IAEA Agricultural & Biotechnology Laboratory, International Atomic Energy Agency, P.O. Box 100, Vienna International Centre Wagramer Strasse 5, A-1400 Vienna, Austria <sup>2</sup> Laboratory of Tropical Crop Improvement, Katholieke Universiteit Leuven, Kasteelpark Arenberg 13 bus 2455, B-3001 Leuven, Belgium <sup>3</sup> Iwate Biotechnology Research Center, 174-4 22 Chiwari, Narita, Kitakami-shi, Iwate, 024-0003 Japan <sup>4</sup> Bioversity International, Honorary Research Fellow, Kasteelpark Arenberg 13 bus 2455, B-3001 Leuven, Belgium Corresponding author: Phone: 0043 (1) 2600-28260, Email: b.till@iaea.org

| ITC code <sup>a</sup> | Common name                                               | Genome | PCA number (Figure 2) | Replicate screening? |
|-----------------------|-----------------------------------------------------------|--------|-----------------------|----------------------|
| ITC0020               | Ice Cream                                                 | ABB    | 16                    | +                    |
| ITC0061               | Musa basjoo                                               | Eumusa |                       |                      |
| ITC0081               | Igitsiri (Intuntu)                                        | AAA    | 17                    | +                    |
| ITC0084               | Mbwazirume                                                | AAA    |                       | +                    |
| ITC0101               | Fougamou 1                                                | ABB    | 8                     | +                    |
| ITC0109               | Obino l'Ewai                                              | AAB    |                       |                      |
| ITC0121               | Ihitisim                                                  | AAB    |                       |                      |
| ITC0125               | Pome                                                      | AAB    |                       |                      |
| ITC0127               | Kamaramasenge                                             | ABcv   | 18                    | +                    |
| IAEA <sup>b</sup>     | Grande Naine, gamma irradiated*                           | AAA    | 9                     | +                    |
| IAEA <sup>b</sup>     | Grande Naine, gamma irradiated                            | AAA    | 10                    | +                    |
| IAEA <sup>b</sup>     | Grande Naine, gamma irradiated                            | AAA    | 11                    | +                    |
| IAEA <sup>b</sup>     | Grande Naine, gamma irradiated                            | AAA    | 12                    | +                    |
| IAEA <sup>b</sup>     | Grande Naine, gamma irradiated                            | AAA    | 13                    | +                    |
| IAEA <sup>b</sup>     | Grande Naine, gamma irradiated                            | AAA    | 14                    | +                    |
| ITC0180               | Grande Naine                                              | AAA    | 15                    | +                    |
| ITC0245               | Safet Velchi                                              | ABcv   | 41                    | +                    |
| ITC0247               | Honduras                                                  | BBw    |                       | +                    |
| ITC0249               | <i>M. acuminata</i> ssp. <i>burmannicoides</i> Calcutta 4 | AAw    | 4                     | +                    |
| ITC0253               | <i>M. acuminata</i> ssp. <i>microcarpa</i> Borneo         | AAw    | 2                     | +                    |
| ITC0254               | <i>M. acuminata</i> ssp. <i>banksii</i> Madang            | AAw    | 24                    | +                    |
| ITC0269               | Niyarma Yik                                               | AAcv   |                       |                      |
| ITC0277               | Leite                                                     | AAA    | 23                    | +                    |
| ITC0279               | Bie Yeng                                                  | AAcv   |                       |                      |
| ITC0281               | Akondro Mainty                                            | AAcv   |                       |                      |
| ITC0283               | Long Tavoy                                                | AA     |                       |                      |
| ITC0312               | Pisang Jari Buaya                                         | AAcv   | 33                    | +                    |
| ITC0332               | Laknau                                                    | AAB    |                       |                      |
| ITC0335               | Popoulou                                                  | AAB    | 37                    | +                    |
| ITC0339               | Pisang Awak                                               | BAB    |                       |                      |

|         |                                          |                       |    |   |
|---------|------------------------------------------|-----------------------|----|---|
| ITC0348 | Silk                                     | AAB                   |    |   |
| ITC0370 | Musa ornata                              | Rhodochlamys          |    |   |
| ITC0393 | M. acuminata<br>ssp.truncata             | AAw                   |    |   |
| ITC0420 | Pisang Kayu                              | AAA                   | 34 | + |
| ITC0463 | Cachaco                                  | ABB                   | 3  | + |
| ITC0472 | Pelipita                                 | ABB                   | 29 | + |
| ITC0486 | Red                                      | AAA                   |    |   |
| ITC0504 | FHIA-01                                  | AAAB                  |    | + |
| ITC0517 | Orishele                                 | AAB                   |    |   |
| ITC0539 | Musa textilis                            | TTw<br>(Australimusa) |    |   |
| ITC0548 | Dwarf Parfitt                            | AAA                   |    |   |
| ITC0565 | Butuhan                                  | BBw                   |    |   |
| ITC0582 | Lady Finger                              | AAB                   | 22 | + |
| ITC0599 | M. schizocarpa No. 1                     | SSw                   |    |   |
| ITC0609 | M. acuminata ssp.<br>malaccensis Pahang  | AAw                   | 28 | + |
| ITC0610 | Tuu Gia                                  | AAcv                  |    |   |
| ITC0627 | Musa laterita                            | Rhodochlamys          |    |   |
| ITC0649 | Foconah                                  | AAB                   | 7  | + |
| ITC0652 | Kluai Tiparot                            | BAB                   | 20 | + |
| ITC0653 | Pisang Mas                               | AAcv                  | 36 | + |
| ITC0654 | Petite Naine                             | AAA                   | 30 | + |
| ITC0659 | Namwa Khom                               | ABB                   | 26 | + |
| ITC0660 | M. acuminata ssp.<br>siamea Khae (Phrae) | AAw                   | 19 | + |
| ITC0683 | Pisang Glintong                          | AAA                   | 32 | + |
| ITC0767 | Dole                                     | ABB                   | 5  | + |
| ITC0769 | Figue Pomme Géante                       | AAB                   | 6  | + |
| ITC0896 | M. acuminata ssp.<br>banksii             | AAw                   |    |   |
| ITC0962 | Prata ana                                | AAB                   | 38 | + |
| ITC1028 | M. acuminata ssp.<br>errans Agutay       | AAw                   | 1  | + |
| ITC1034 | Kunnan                                   | ABcv                  | 21 | + |
| ITC1063 | Pisang Klutuk Wulung                     | BBw                   | 35 | + |
| ITC1070 | Musa beccarii                            | Callimusa             |    |   |
| ITC1120 | M. balbisiana Tani                       | BBw                   |    | + |
| ITC1123 | Yangambi KM5                             | AAA                   | 43 | + |
| ITC1138 | Saba                                     | ABB                   | 40 | + |
| ITC1140 | Red Yade                                 | AAB                   | 39 | + |
| ITC1152 | Wompa                                    | SACv                  |    |   |
| ITC1158 | Pisang Rojo Uter                         | AAcv                  |    |   |
| ITC1167 | Mai'a maoli koa'e                        | AAB                   |    |   |
| ITC1177 | M. acuminata ssp.<br>zebrina             | AAw                   |    | + |
| ITC1187 | Tomolo                                   | AAcv                  | 42 | + |
| ITC1238 | Yawa 2                                   | ABBT                  | 44 | + |
| ITC1254 | Paka                                     | AAcv                  |    |   |
| ITC1256 | Gran Enano                               | AAA                   |    |   |
| ITC1329 | Novaria                                  | AAA                   | 27 | + |
| ITC1356 | Mbwazirume                               | AAA                   | 25 |   |

|         |                    |      |    |   |
|---------|--------------------|------|----|---|
| ITC1387 | Ensete ventricosum | -    |    |   |
| ITC1400 | Pisang Lilin       | AAcv |    |   |
| ITC1404 | Bluggoe            | ABB  |    |   |
| ITC1441 | Pisang Ceylan      | AAB  | 31 | + |
| ITC1481 | Gros Michel        | AAA  |    |   |

<sup>a</sup> <http://www.crop-diversity.org/banana/#AvailableITCAccessions>

<sup>b</sup> From the internal collection of the IAEA laboratories
